# Supplementary material for: Lower DLco% identifies exercise pulmonary hypertension in patients with parenchymal lung disease referred for dyspnea
Source: PubMed Central journal article supplement — Pulm Circ. 2020 Feb 19;10(1):2045894019891912. doi: 10.1177/2045894019891912 (PMC7031800; doi:10.1177/2045894019891912), 2020-02-19
Supplement: PUL891912_Supplemental_material.pdf [file PUL891912_Supplemental_material.pdf]

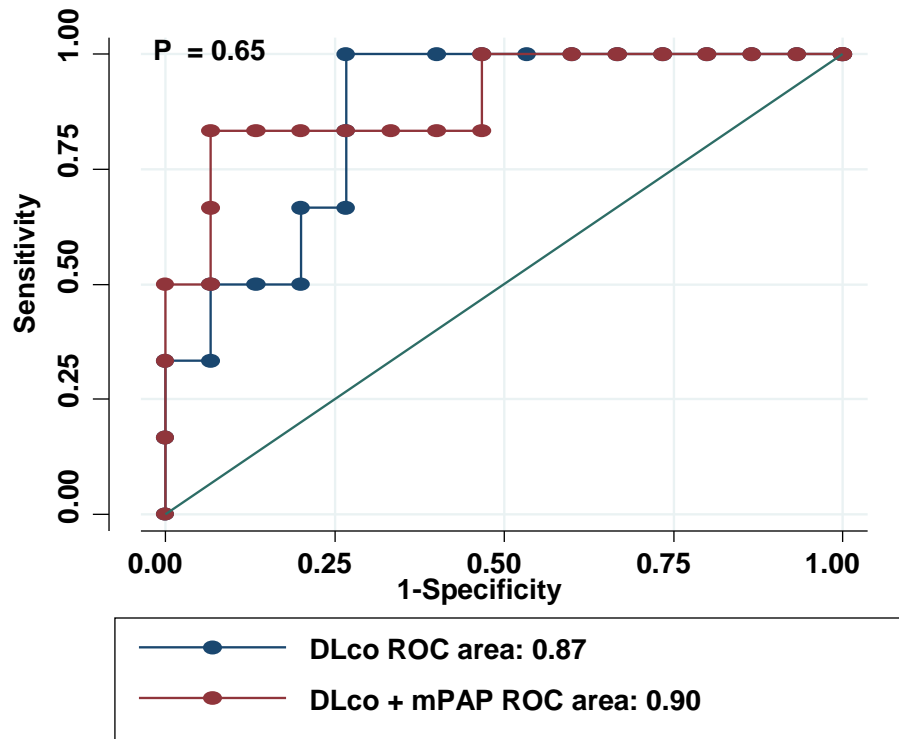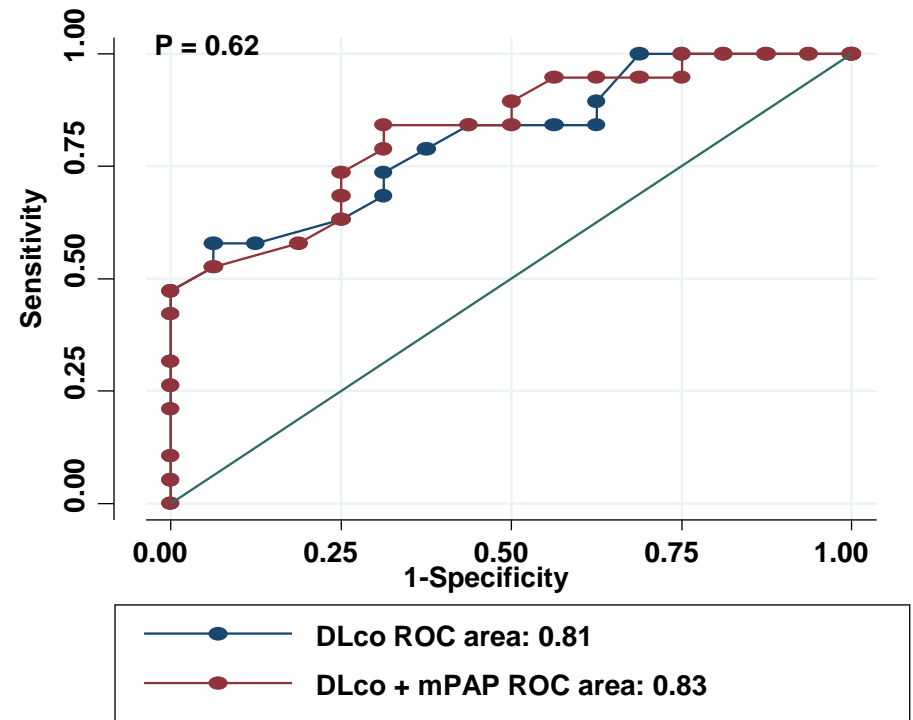

**Supplementary Figure 1. ROC Curve Analysis with addition of resting supine legs down mPAP 20-24 mmHg. A.** No additional diagnostic value to optimal DLco 46% in patients with parenchymal lung disease. **B.** No additional diagnostic value to optimal DLco 73% in patients without parenchymal lung disease.
